# Supplementary material for: Activity and Crystal Structure of the Adherent-Invasive Escherichia coli Tle3/Tli3 T6SS Effector/Immunity Complex Determined Using an AlphaFold2 Predicted Model
Source: MDPI journal article supplement (doi:10.3390/ijms24021740), 2023-01-16

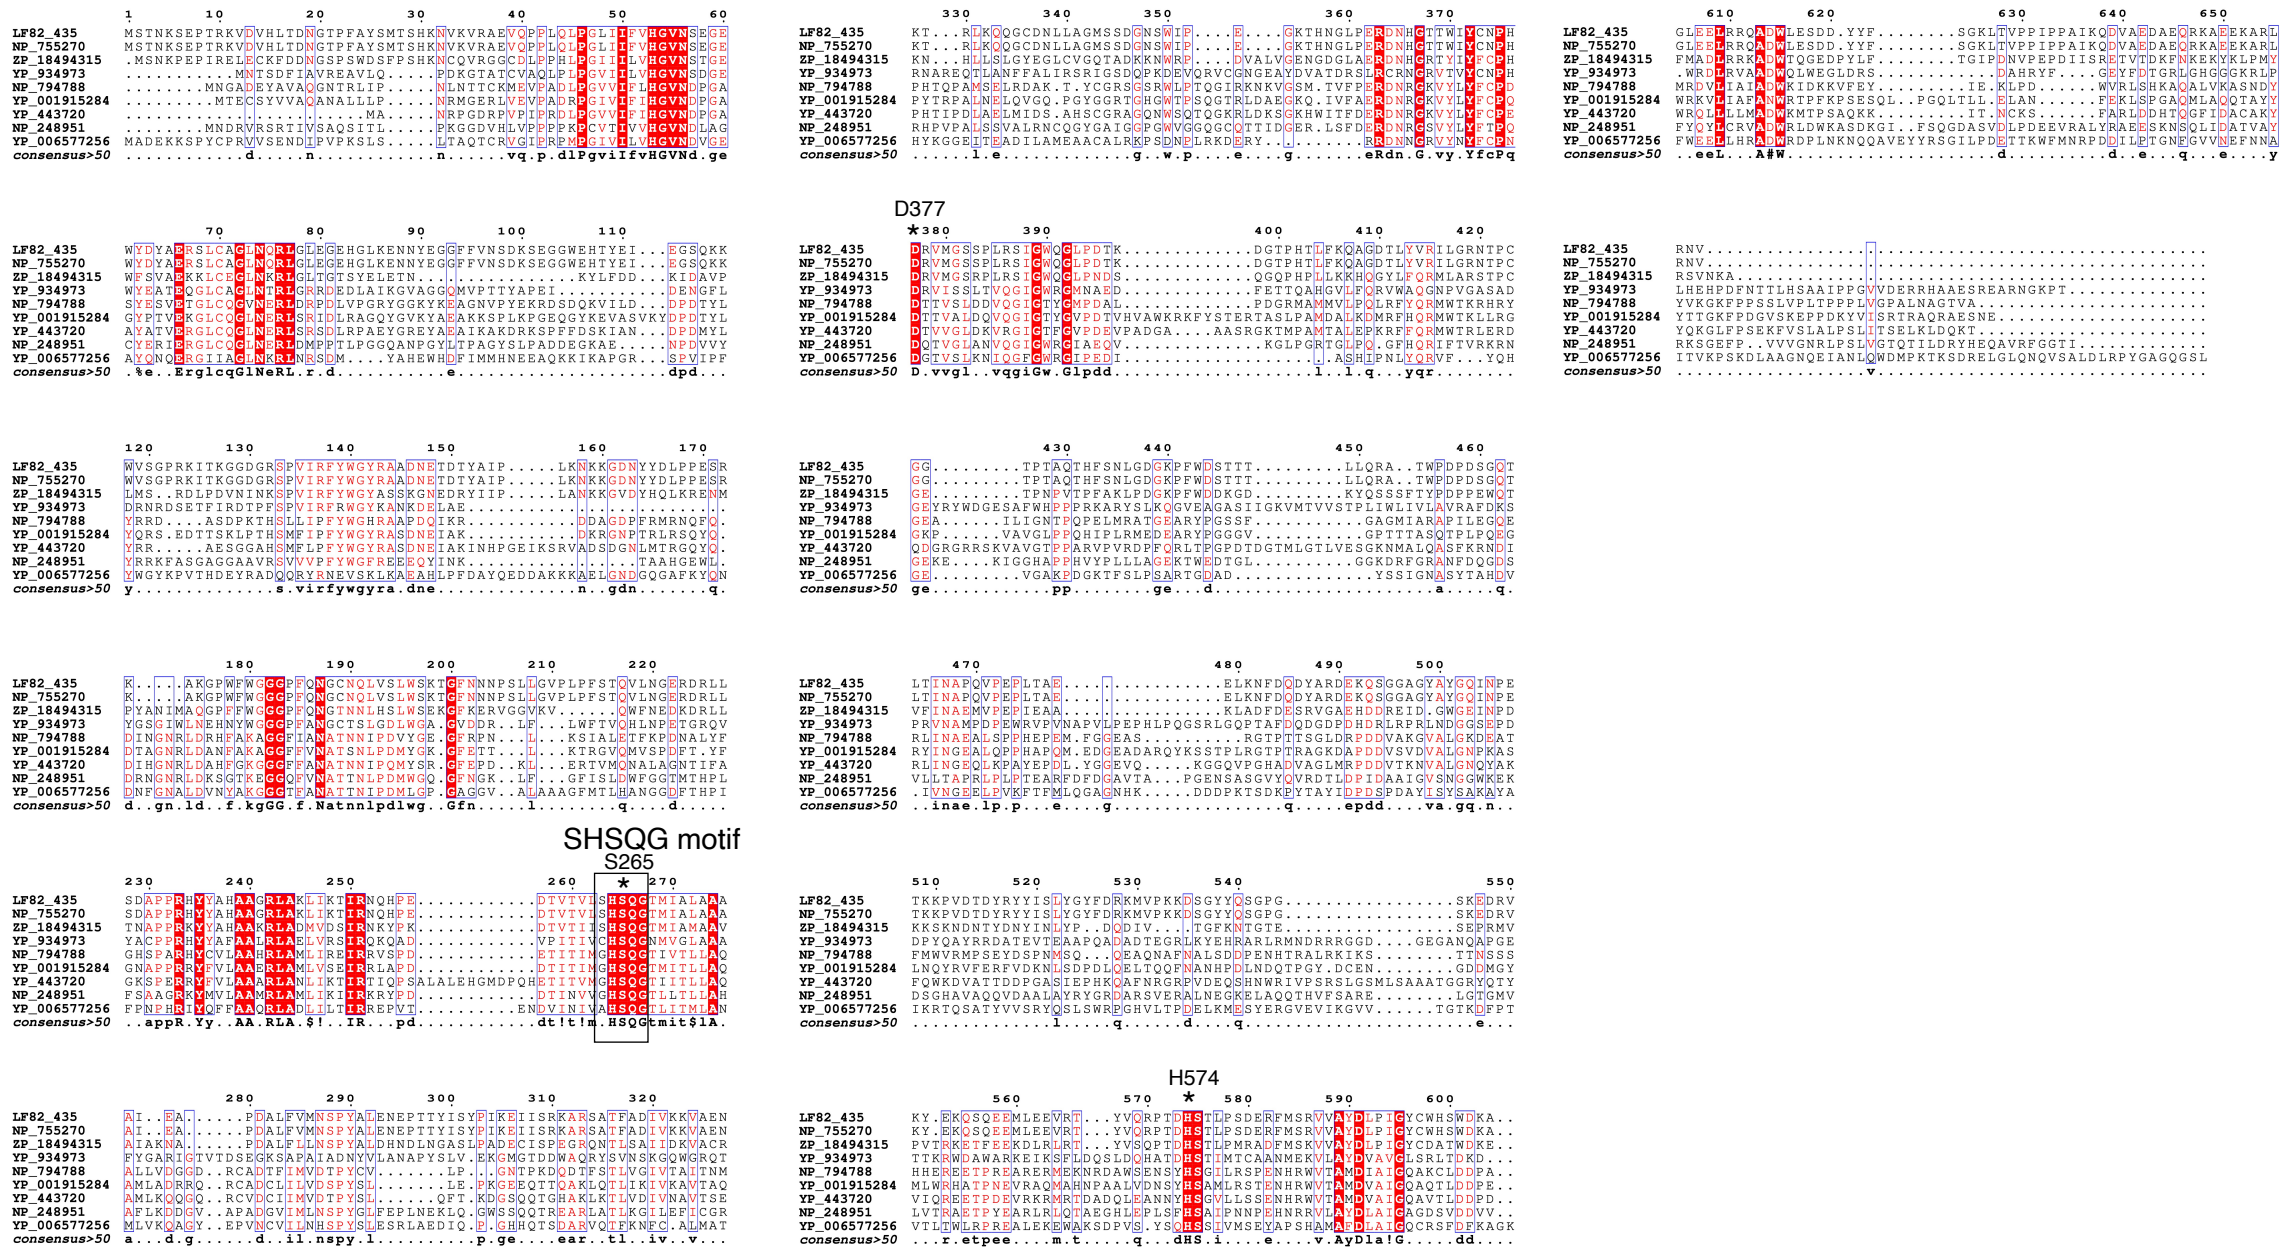

**Figure S1. Multiple alignment of Tle3 family members.** Sequence alignment of LF82\_435 (Tle3<sup>AlEC</sup>) with representative members of Tle3 family identified in Russell *et al.*, 2013. The alignment highlights the GXSG motif (S/G/C/A)HSQG motif of the Tle3 family, where the first G residue is replaced here by S, C or A. The S265, D377, and H574 residues of the catalytic triad are indicated by stars. Figure prepared using MultAlin (Corpet *et al.*, 1988).



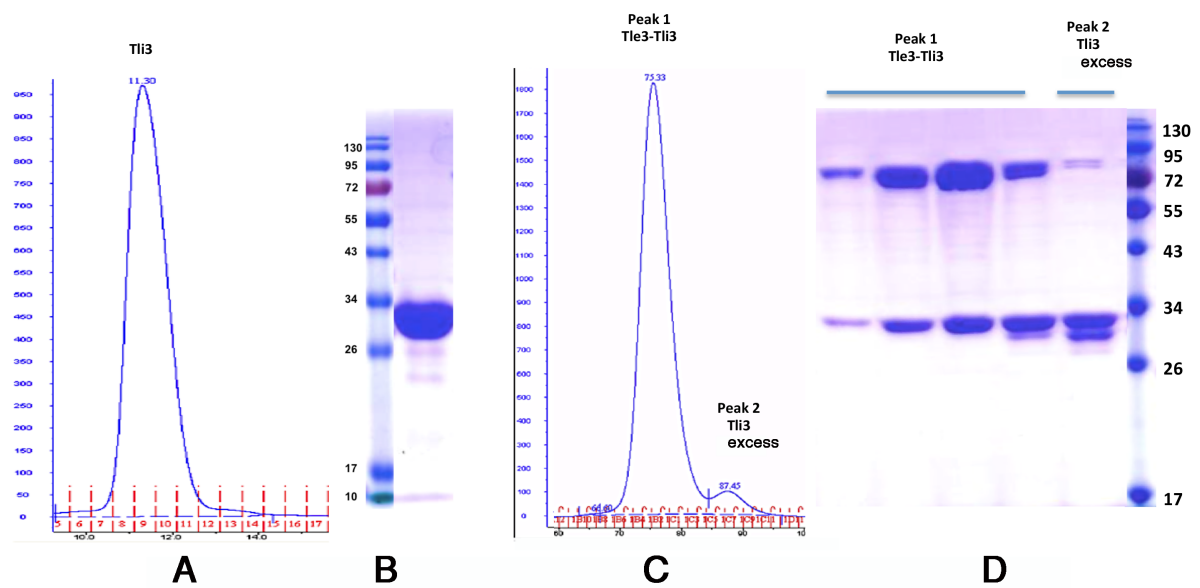

**Figure S3: Gel filtration chromatography and SDS gels of the proteins under study.**  
**A:** Gel filtration chromatogram of Tli3. **B:** SDS gel of Tli3 (right) with molecular weight markers on the left. **C:** Gel filtration chromatogram of the Tle3-Tli3 complex. **D:** SDS gels along the Tle3-Tli3 complex gel filtration fractions (left) and molecular weight markers on the right.

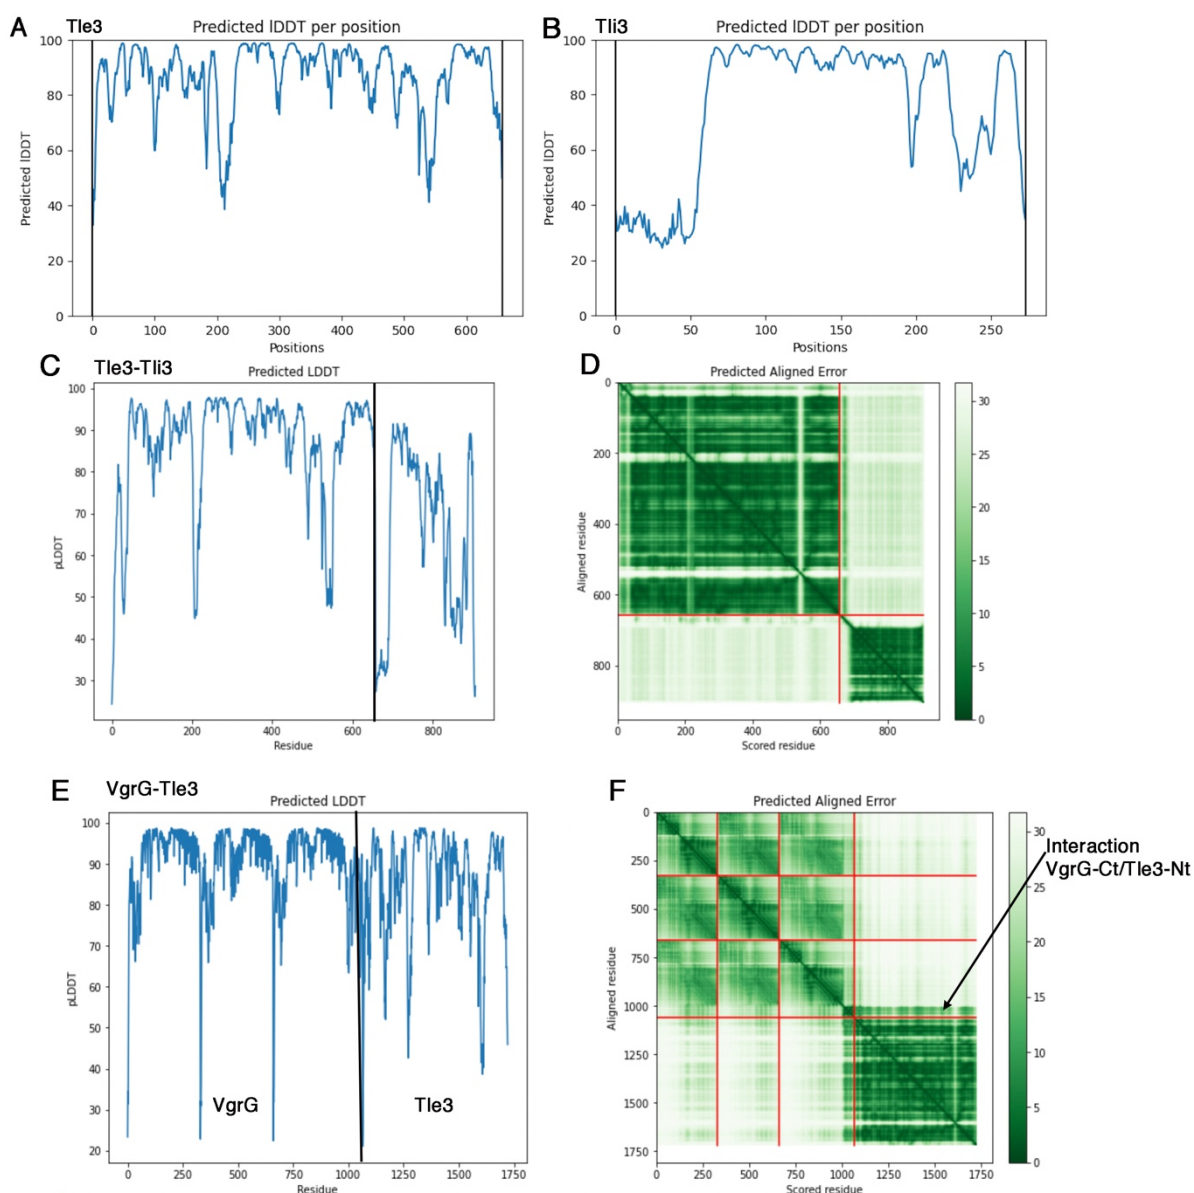

**Figure S4. AlphaFold2 predicted local distance difference (pLDDT) and predicted aligned errors (PEA) output graphs. A:** pLDDT of Tle3. **B:** pLDDT of Tli3. **C:** pLDDT of the Tle3-Tli3 complex (Tle3 left;Tli3 right). **D:** PEA of the Tle3-Tli3 complex. **E:** : pLDDT of the Tle3-VgrG<sub>3</sub> complex. **F:** PEA of the Tle3- VgrG<sub>3</sub> complex



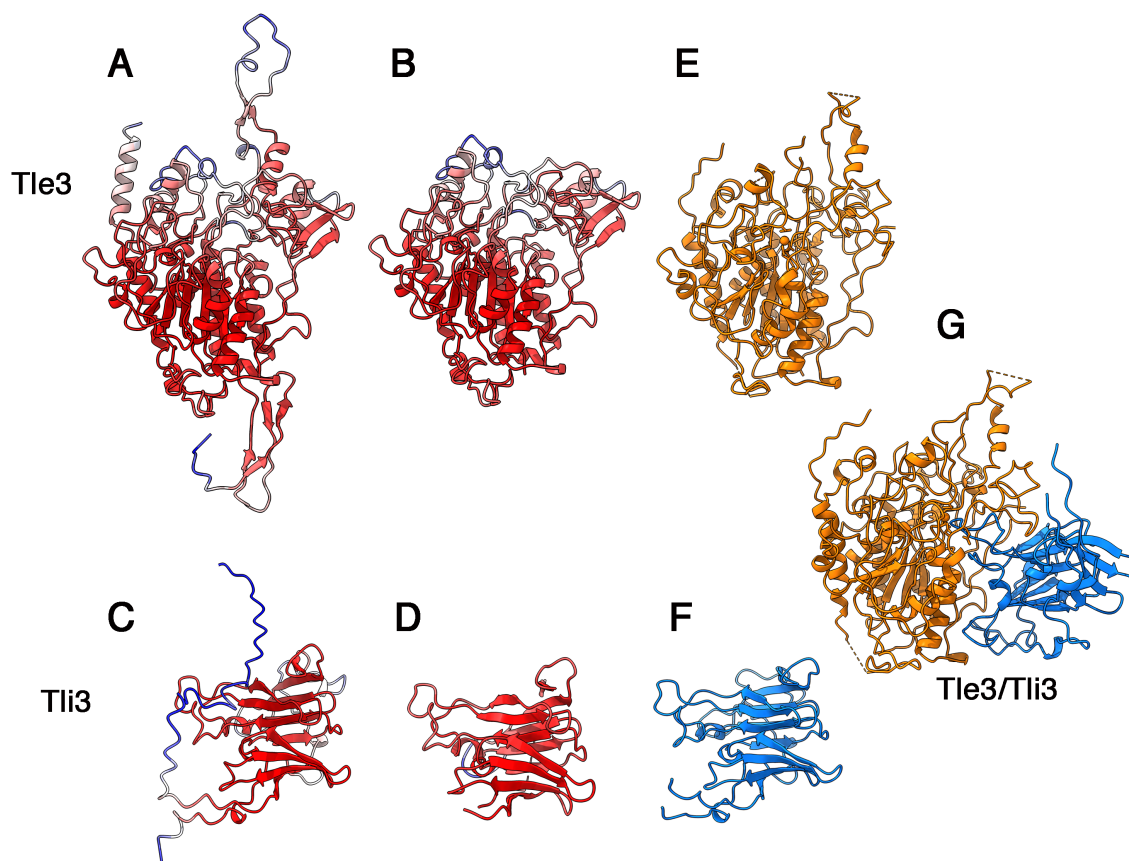

**Figure S5. Molecular replacement strategy.** **A:** The AlphaFold2 Tle3 prediction. **B:** The poorly predicted parts of Tle3 (white and blue in A) where removed yielding the Tle3 model used for molecular replacement. **C:** The AlphaFold2 Tli3 prediction. **D:** The poorly predicted parts of Tli3 (white and blue in C) where removed yielding the Tli3 model used for molecular replacement. **E, F, G:** The final refined structures of Tle3 (E), Tli3 (F) as present in the complex (G).

A

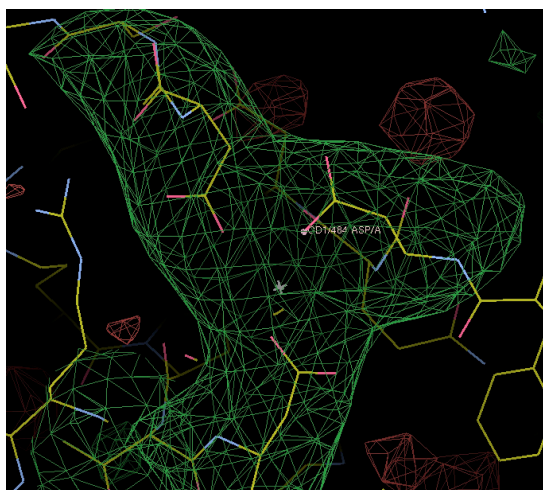

B

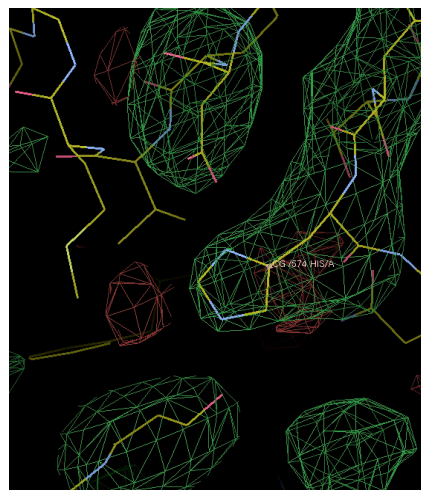

**Figure S6. Omit maps around the Ca<sup>++</sup> binding site and catalytic triad.** The three catalytic amino-acids, the Ca<sup>++</sup> ion and the three Ca<sup>++</sup> binding Asp were deleted, and three cycles of full refinement with the remaining model were performed.

## Supplementary Table 1. Plasmids and Primers

### **pETG20A-Tle3**

5-attb1-LF82\_435L

GGGGACAAGTTTGTACAAAAAAGCAGGCTTCATGAGTACCAATAAATCAGAGCCAA  
C

3-attb2-LF82\_435L

GGGGACCACTTTGTACAAGAAAGCTGGGTCTTACACATTACGTAACCGGGCC

### **pET-Duet-<sup>S</sup>VgrG<sup>AIEC</sup>**

5-BamHI-<sup>STREP</sup>VgrG

GATCGGATCCAAGGAGATATACATATGTGGAGCCACCCGCAGTTCGAAAAAGAGGCTCTTATGA  
ACGTACAGTTCTTCGAC

3-HindIII-VgrG

GTATAAGCTTTTATTTTTTCAGAATAATTTTTAGGTCATCAGATGCTTTTGACG

### **pRSF-Duet1-Tle3<sup>H</sup>**

5-NdeI-Tle3

GTCGCATATGAGTACCAATAAATCAGAGCCAACCCGAAAG

3-FseI-Tle3<sup>H</sup>

GATCGGCCGGCCTTAGTGGTGATGATGGTGATGCACATTACGTAACCGGGCCTTTTCTTCTGC

### **pBAD33-Tli3<sup>VSVG</sup>**

5-pBAD- LF82 p434 -VSVG

ctctctactgtttctccatacccggtttttgggctagcaggaggtattacaccATGTTGAAAGAATGGATGATATTTACG

3-pBAD- LF82 p434 –VSVG

ggtcgactctagaggatccccgggtaccTTATTTTCCTAATCTATTCATTTC AATATCTGTATATTGAATTTACT  
CTCTGAAGGTTG

<sup>a</sup> restriction site in bold

<sup>b</sup> StrepII-tag or His-tag coding sequence italicized

<sup>c</sup> optimized RBS sequence underlined

<sup>d</sup> sequence annealing to the target vector in lowercase

## Uncropped gels

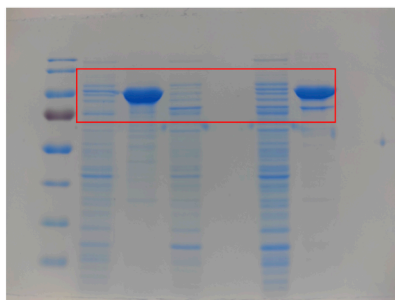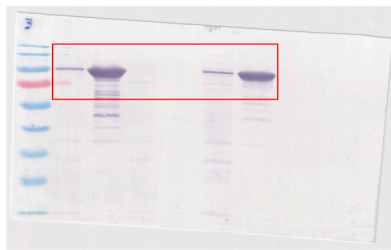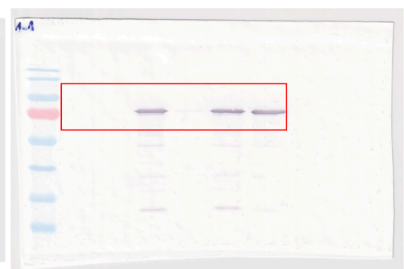

Supplement: s1 [file s1]
